1 **The summary diagram of discovered host immunological**  
2 **pathways against different pathogens and its relation to**  
3 **hypersensitivities**

4  
5 **Summary diagram of host immune responses**  
6

7 **Wan-Chung Hu\***

8 MD National Taiwan University

9 PhD Johns Hopkins University

10 Department of Clinical Pathology, Far Eastern Memorial Hospital, New Taipei City,  
11 Taiwan

12

13 **\*Correspondence:**

14 Wan-Chung Hu

15 [Wanchung.Hu09@gmail.com](mailto:Wanchung.Hu09@gmail.com)

16

17 **Keywords: Tr1, Th1, Th2, Th17, Th19, Th22, Treg, Tfh**

18

19 **BioRxiv preprint doi:** <https://doi.org/10.1101/006965>

20

21

22

23

24

25

26

27

28

29

30

31

32

33

34

35

36 **Abstract**

37 Since the TH1 and TH2 immune response paradigm, more host immunological  
38 pathways have been discovered including TH17, TH9, TH22, Tr1, Treg, Tfh, TH3,  
39 and TH1like recently. These immunological pathways' functional clinical importance  
40 is not clearly known. In this article, the host immunological pathways are re-  
41 organized to get a clear picture. There are four eradicable immune responses:  
42 TH1/TH2/TH22/TH $\alpha\beta$  which correspond to four tolerable immune responses:  
43 TH1Like/TH9/TH17/TH3. TH1/TH1like provides immunity against intracellular  
44 bacteria or protozoa and is related to type4 delayed-type hypersensitivity. TH1  
45 immunity includes M1 macrophages, CTLs(Tc1), IFN- $\gamma$  producing CD4 T cells, and  
46 IgG3 producing B cells. TH1Like immunity includes M2 macrophages, suppressive  
47 CTL, IFN- $\gamma$ /TGF- $\beta$  producing CD4 T cells, and IgA1 producing B cells. TH2/TH9  
48 provides immunity against helminths and is related to type1 immediate allergy. TH2  
49 immunity includes eosinophils(iEOS), basophils/mast cells(MCct), IL-4 producing  
50 CD4 T cells, and IgE/IgG4 producing B cells. TH9 immunity includes eosinophils  
51 (rEOS), basophils/mast cells(MCt), IL-9 producing CD4 T cells, and IgA2 producing  
52 B cells. TH22/TH17 is an immunity against extracellular bacteria or fungi and is  
53 related to type3 immune-complex hypersensitivity. TH22 immunity includes  
54 neutrophils(N1), IL-22 producing CD4 T cells, and IgG2 producing B cells. TH17  
55 immunity include neutrophils(N2), IL-17 producing CD4 T cells, and IgA2 producing  
56 B cells. TH $\alpha\beta$ /TH3 is an immunity against viruses and is related to type2 antibody  
57 dependent cytotoxic hypersensitivity. TH $\alpha\beta$  immunity includes stimulatory NK  
58 cells(NK1), CTLs(Tc2), IL-10 producing CD4 T cells, and IgG1 producing B cells.  
59 TH3 immunity includes regulatory NK cells(NK2), suppressive CTLs, IL-10/TGF $\beta$   
60 producing CD4 T cells, and IgA1 producing B cells. THfh is the stimulatory pathway  
61 to initiate adaptive immunity. Cytokines can help to drive initiatory immunities to  
62 eradicable immune reactions. Another inhibitory pathway Treg is the key player  
63 which is used to change immune responses to tolerable immune responses which  
64 generate milder cytokines and other immune mediators to avoid severe destruction of  
65 tissue-organ during any chronic large scale infection. This 4x2+2, the whole diagram  
66 of host immunological pathways, describes initiatory, eradicable, regulatory, and  
67 tolerable immune responses.

68

69

70

71

72

73 **Main Text**

74 There are many discovered host immunological pathways including traditional TH1,  
75 TH2, TH3, TH17, TH22, THfh, Treg, TH9, and Tr1(TH $\alpha\beta$ ). These identified  
76 pathways are not logically organized. Here, I will propose a detailed picture about the  
77 whole context of host immunological pathways. (Figure 1)

78

79 The traditional TH1/TH2 paradigm was proposed by Dr. Mosmann in 1986(1). TH1  
80 was thought to be the host immunity against viruses and intracellular bacteria. TH2 is  
81 the host immunity against multicellular parasites (helminths). In my PhD thesis, I  
82 proposed a new TH $\alpha\beta$  immunological pathway against viruses that is separated from  
83 the traditional TH1 immunity(2). The TH1 immunity is then focusing on intracellular  
84 bacteria and protozoa. Later, TH3 immunity and Tr1 immunological pathways were  
85 identified later(3, 4). Recently, additional immune responses have been discovered  
86 including TH17, TH22, THfh, Treg, and TH1-like immunological pathways(5-8).

87

### 88 **Initiatory immune response**

89

90 Follicular helper T cells (THfh) are thought to be the key helper cells for the B cell  
91 germinal centers in lymph nodes. THfh cells are characterized by IL-21 producing T  
92 cells. BCL6 is a key transcription factor for THfh. TGF $\beta$  with STAT5 signal can  
93 constrain the differentiation of the IL-21 producing helper T cells(9). IL-21  
94 production is also related to STAT1 and STAT3 activation as well as STAT5 activation,  
95 since immunosuppressive prolactin can induce STAT5a to suppress BCL6  
96 expression(10, 11). On the contrary, STAT5b can up-regulate BCL6. STAT5a and  
97 STAT5b have distinct target genes in immune responses. The transcription factor to  
98 induce THfh should be STAT5b. BCL6 is key in THfh development(12). The  
99 follicular helper T cell can induce B cells to start to produce IgM antibody. Thus, it is  
100 the earliest T lymphocytes to begin the adaptive host immunity(13-14). Different  
101 STAT proteins regulate different immunological pathways. If the infection is tend to  
102 be eradicable, the following host immunological pathways are generated with other  
103 cytokines.

104

### 105 **Eradicable immune responses**

106

107 TH1 immunity is driven by IL-12. It is the host immunity against intracellular bacteria  
108 or protozoa. The main effector cells of TH1 immunity are stimulatory macrophages  
109 (M1), IFN- $\gamma$  secreting cytotoxic CD8 T cells (Tc1), IFN- $\gamma$  secreting CD4 T cells, and  
110 IgG3 producing B cells(15-18). The key transcription factor for TH1 immunity is  
111 STAT4. T-bet also plays a vital role in the TH1 immunological pathway. The TH1

112 immunity against self antigen is a Type 4 Delayed-type hypersensitivity, such as  
113 found in type1 diabetes mellitus(19).

114

115 TH2 immunity is driven by IL-4. TH2 immunity is effective against extracellular  
116 parasites (helminths) or insects. The main effector cells of TH2 immunity are  
117 eosinophils (iEOS), basophils/connective tissue mast cells(MCtc, mast cell tryptase &  
118 chymase), IL-4/IL-5 secreting CD4 T cells, and IgG4/IgE producing B cells(20). IgG4  
119 activates eosinophils and IgE activates mast cells such as in acute anaphylaxis,  
120 respectively(21). The function of IgG4-eosinophil is to activate eosinophil mediated  
121 cellular immunity against parasites or insects. The function of IgE-mast cell is to  
122 expel helminths or insects by physiological mechanism. Activated mast cells by IgE  
123 can release histamine which causes bronchoconstriction, vomiting/nausea, rhinorrhea,  
124 skin itchiness, stomach acidification, increased local vascular permeability, or  
125 increased bowel movement. These actions can all help to expel helminths or insects  
126 physiologically. The key transcription factor for TH2 immunity is STAT6. GATA3  
127 also plays a vital role in TH2 immunological pathway. TH2 immunity against self  
128 antigen is Type1 immediate allergy such as food/drug allergy or urticaria.

129

130 TH $\alpha\beta$  is distinguished from the traditional TH1 immunity(2). TH $\alpha\beta$  immunity  
131 provides protection against viruses. It was called Tr1 cell by some previous  
132 researchers(4). TH $\alpha\beta$ immunity is driven by IFN- $\alpha/\beta$  or IL-10. The main effector cells  
133 of TH $\alpha\beta$  immunity are IL-10 producing stimulatory NK cells(CD56-CD16+ NK1  
134 cells), IL-10/IL-27 secreting CD4 T cells, IL-10 secreting cytotoxic CD8 T cells  
135 (Tc2), and IgG1 producing B cells(15,17,19,22). CD27 molecule is an important  
136 component for virus immunity. The key transcription factor for TH $\alpha\beta$  immunity is  
137 STAT1and STAT2. TH $\alpha\beta$  immunity against self-antigen is a Type 2 Antibody  
138 dependent cytotoxic hypersensitivity such as the acute stage of Myasthenia Gravis. It  
139 is worth noting that IL-10 is not merely an immunosuppressive cytokine; it can have  
140 potent stimulatory effects on NK cells, CTLs, and B cells(23).

141

142 TH22 is the innate immunity against extracellular bacteria and fungi(24). TH22 is  
143 driven by IL-6 or TNF- $\alpha$ . The main effector cells for TH22 immunity are PMNs(N1),  
144 IL-22 secreting CD4 T cells, complements, pentraxins, and IgG2 producing B  
145 cells(6). The key transcription factor for TH22 is STAT3. AP1 and CEBP are also  
146 important. TGF beta can suppress IL-22 to skew to TH17 immunity(25). TH22  
147 against self-antigen is Type 3 immune-complex and complement mediated  
148 hypersensitivity such as Arthus reaction. It is worth noting that the extracellular or  
149 intracellular locations of protozoa or fungi mainly decide the host immunological

150 pathways.

151

152 It is interesting to know that four IgG subtypes fit the four types of acute  
153 immunological pathways. Murine IgG antibodies also have four subclasses. There is a  
154 correlation between murine and human IgG subtypes: Human IgG1<->Murine IgG2a;  
155 Human IgG2<->Murine IgG3; Human IgG3<->Murine IgG2b; Human IgG4<-  
156 >Murine IgG1. hIgG1/mIgG2a is effective against viral antigens; hIgG2/mIgG3 is  
157 effective against bacterial antigen, especially polysaccharides; hIgG3/mIgG2b is  
158 effective against intracellular bacteria; and hIgG4/mIgG1 is related to parasite  
159 antigens(26-28).

160

### 161 **Regulatory immune responses**

162

163 Treg is the host immune inhibitory mechanism. It is driven by IL-2 and TGF- $\beta$ . The  
164 main effector cells for Treg are TGF- $\beta$  producing CD4 T cells and IgA producing B  
165 cells. The key transcription factor for Treg pathway is STAT5, especially STAT5A.  
166 However, both STAT5A and STAT5B play non-redundant roles in Treg  
167 generation(29). They may act sequentially with STAT5B activation first in THfh  
168 signaling. A combination STAT5B and STAT5A signaling induces the generation of  
169 Treg. The combination of Treg and the above four immunological pathways is  
170 important to change adaptive immunity to tolerable immunity. During the initial  
171 infection, acute stage fierce cytokines can rapidly kill pathogens as well as infected  
172 cells or tissues. However, if the pathogen infects a lot of cells in a tissue such as liver,  
173 killing the infected cells will totally destroy the organ(30). Thus, the regulatory T cells  
174 STAT5 signal combined with TH1/TH2/TH22/TH $\alpha\beta$  will make CD4 T cells with less  
175 fierce cytokines(29). Then, the TH1like/TH9/TH17/TH3 immunological pathways  
176 will be generated in a more chronic stage. It is worth noting that there are two  
177 subtypes of IgA antibodies: IgA1 and IgA2. IgA1 is the dominant IgA antibody in  
178 serum, and IgA2 is the dominant IgA in mucosa. TGF- $\beta$  can induce either IgA1 or  
179 IgA2, both of which seem to be dependent on the lymphoid follicle location(31). In  
180 GULTs or Peyer's Patch, IgA2 is the dominant IgA antibody produced in the GI  
181 mucosa there. In lymph nodes of other body locations, IgA1 is the dominant IgA  
182 antibody produced there. However, IgA1 is especially related to viral protein antigens  
183 and IgA2 is especially related to bacterial antigens such as LPS(32). The heavy chain  
184 locus sequence of B cell antibodies is IgM, IgD, IgG3, IgG1, IgA1, IgG2, IgG4, IgE,  
185 and IgA2. First, B cells double express IgM and IgD. We can view IgG3, IgG1, and  
186 IgA1 as the first group for cellular immunity. Then, IgG2, IgG4, IgE, and IgA2 can be  
187 viewed as the second group for humoral immunity. The gene sequence order is

188 important, and it affects the time sequence of isotype switch. It is also worth noting  
189 that IL-13 is also a Treg related cytokine which is pro-fibrogenic and related to TGF- $\beta$   
190 signaling.

191

### 192 **Tolerable immune responses**

193

194 TH1-like cells (non-classic TH1) are initiated by TGF- $\beta$ (STAT5 signaling) and IFN-  
195  $\gamma$ (STAT4 signaling). TH1-like cells with Foxp3<sup>+</sup> regulatory character are identified(8,  
196 33). There is a close relation to TH1 helper cells and TH1-like cells. TH1-like cells are  
197 the chronic host immunity of the TH1 immune response. Thus, it could be related to  
198 chronic inflammation such as long-term tuberculosis infection. The effector cells of  
199 TH1-like immunity include suppressive macrophages (M2), suppressive CD8 T cells  
200 (CD28<sup>-</sup>), IgA1 producing B cells, and IFN- $\gamma$ /TGF- $\beta$  producing CD4 T cells(16,17). A  
201 TH1-like immunity induces type4 delayed-type hypersensitivity such as Crohn's  
202 disease.

203

204 TH9 cell is driven by IL-4 (STAT6 signaling) which combines TGF- $\beta$ (STAT5  
205 signaling)(34,35). Thus, TH9 cell is closely related to TH2 immunological pathway,  
206 and is characterized by IL-9 secreting CD4 T cell. TH9 cells are found to be important  
207 in a chronic allergic condition such as asthma. Thus, TH9 helper cell is the chronic T  
208 helper cells related to TH2 immunity. The effector cells of TH9 immunity include  
209 regulatory eosinophils(rEOS), basophils/mucosal mast cells (MCt, mast cell tryptase),  
210 IL-9 producing CD4 T cells, and IgA2 producing B cells(36). TH9 immunity induces  
211 type1 allergy including asthma(20, 37).

212

213 The TH17 cell is driven by IL-6 / IL-1 which combines TGF- $\beta$ (5). Thus, TH17 cell is  
214 closely related to TH22 immunological pathway. It is characterized by the IL-17  
215 secreting CD4 T cell. TH17 cells are found to be important in chronic immune-  
216 complex mediated disease such as rheumatic arthritis. The TH17 helper cell is the  
217 chronic T helper cell related to TH22 immunity. TGF beta with STAT5 can suppress  
218 the acute IL-22 producing cells and enhance the chronic IL-17 producing cells (25).  
219 Because of the role of TGF- $\beta$  in TH17 immunity, regulatory IL-17 producing cells are  
220 noted. The effector cells of TH17 immunity include regulatory neutrophils(N2), IL-17  
221 producing CD4 T cells, and IgA2 producing B cells(32).The TH17 immunity induces  
222 type3 immune-complex hypersensitivity including ulcerative colitis.

223

224 TH3 cells are driven by IL-10 and TGF beta. Thus, TH3 cells are closely related to  
225 TH $\alpha$  immunological pathway. It also produces the IL-10 as well as the TGF- $\beta$ . Thus,

226 the TH3 helper cell is important to a person with chronic antibody dependent cellular  
227 cytotoxic hypersensitivity. The TH3 cell includes the chronic helper T cells  
228 corresponding to TH $\alpha$  $\beta$  helper cell. The TH3 immune effector cells include the IL-13  
229 producing regulatory NK cells(CD56+CD16- NK2 cells), IL-10 and TGF- $\beta$  secreting  
230 CD4 T cells, suppressive CD8 T cells (CD28-), and IgA1 producing B cells(17,22).  
231 IgA1 is produced in serum and is against viral protein antigens. TH3 immunity  
232 induces type2 antibody dependent cytotoxic hypersensitivity including chronic stage  
233 of SLE.

234

### 235 **Conclusions**

236

237 This summary diagram: 4x2+2 immunological pathways present the whole pictures of  
238 the host immunological pathways. There are four eradicable immune responses:  
239 TH1/TH2/TH22/TH $\alpha$  $\beta$  which corresponde to four tolerable immune responses:  
240 TH1Like/TH9/TH17/TH3. These responses will match the four types of  
241 hypersensitivity. From these evidences, we can then clearly understand the detailed  
242 immune response against different pathogens as well as allergy/hypersensitivity.

243

### 244 **Conflict of Interest**

245 *The authors declare that the research was conducted in the absence of any*  
246 *commercial or financial relationships that could be construed as a potential conflict*  
247 *of interest.*

248

### 249 **Author Contribution**

250 Wan-Chung Hu is completely responsible for the idea formation, literature research,  
251 and manuscript writing for this study.

252

### 253 **Funding**

254 There was no funding for the study of this review article.

255

### 256 **Acknowledgement**

257 The author is very thankful for the instruction by Professors Alan Scott, Louis August  
258 Bourgeois, and Pien-Chien Huang in my PhD study of the vaccine science track of the  
259 Department of International Health of Johns Hopkins University Bloomberg School  
260 of Public Health. The author is also very grateful for the guidance of Professors Chi-  
261 Huey Wong and Alice, Lin-Tsing Yu in my postdoctorate research in the Genomics  
262 Research Center of the Academia Sinica, Taiwan.

263

264 **Author's Information**

265 The author, Wan-Chung Hu, graduated with a MD from National Taiwan University.  
266 Then, he went to the Department of International Health, the Johns Hopkins  
267 University Bloomberg School of Public Health for study and received a PhD in the  
268 field of vaccine science PhD. His PhD thesis is a study of the host immune reaction  
269 against malarial infection. He completed postdoctorate study in the area of cancer  
270 immunotherapy in the Genomics Research Center of the Academia Sinica, Taiwan. He  
271 finishes his PGY training in Mackay Memorial Hospital and Shin-Kong Memorial  
272 Hospital, both of which are located in Taiwan. Now, he is currently working as a chief  
273 resident in the Department of Clinical Pathology of Far Eastern Memorial Hospital in  
274 Taiwan R.O.C. for resident training.

275

276 **Contribution to the Field Statement**

277 Recently, many new host immunological pathways (T helper cell lineages) have been  
278 discovered including TH17, TH22, or TH9. Along with the older TH1/TH2 paradigm,  
279 new host immunological pathways have made the host immunity more complicated  
280 and difficult. And, we don't know the relation of those host immunological pathways  
281 and different pathogens as well as types of hypersensitivities. Thus, this article  
282 summarized those host immunological pathways which have been discovered to set  
283 up a new paradigm. This new paradigm explains those host immunological pathways  
284 which may be used with four different pathogen infection (virus, intracellular  
285 bacteria/protozoa, extracellular bacteria/fungi, and helminthes) and are related to four  
286 types of allergy/hypersensitivities. Thus, host immune response lineages can be well  
287 explained. This is a very important development in the field of immunology. Please  
288 see the brief abstract in BioRxiv doi: <https://doi.org/10.1101/006965>.

289

290

291

292 **References**

293

- 294 1. T. R. Mosmann, H. Cherwinski, M. W. Bond, M. A. Giedlin and R. L. Coffman: Two  
295 types of murine helper T cell clone. I. Definition according to profiles of lymphokine  
296 activities and secreted proteins. *J Immunol*, 136(7), 2348-57 (1986)
- 297 2. W. C. Hu: Human immune responses to Plasmodium falciparum infection:  
298 molecular evidence for a suboptimal TH1alpha and TH17 bias over ideal and  
299 effective traditional TH1 immune response. *Malar J*, 12(1), 392 (2013)  
300 doi:10.1186/1475-2875-12-392
- 301 3. S. Kumar, R. A. Naqvi, N. Khanna, P. Pathak and D. N. Rao: Th3 immune



- 302 responses in the progression of leprosy via molecular cross-talks of TGF-beta, CTLA-4  
303 and Cbl-b. *Clin Immunol*, 141(2), 133-42 (2011) doi:10.1016/j.clim.2011.06.007
- 304 4. M. K. Levings, R. Sangregorio, F. Galbiati, S. Squadrone, R. de Waal Malefyt and  
305 M. G. Roncarolo: IFN-alpha and IL-10 induce the differentiation of human type 1 T  
306 regulatory cells. *J Immunol*, 166(9), 5530-9 (2001)
- 307 5. L. E. Harrington, R. D. Hatton, P. R. Mangan, H. Turner, T. L. Murphy, K. M.  
308 Murphy and C. T. Weaver: Interleukin 17-producing CD4+ effector T cells develop via  
309 a lineage distinct from the T helper type 1 and 2 lineages. *Nat Immunol*, 6(11), 1123-  
310 32 (2005) doi:10.1038/ni1254
- 311 6. S. Eyerich, K. Eyerich, D. Pennino, T. Carbone, F. Nasorri, S. Pallotta, F. Cianfarani,  
312 T. Odorisio, C. Traidl-Hoffmann, H. Behrendt, S. R. Durham, C. B. Schmidt-Weber and  
313 A. Cavani: Th22 cells represent a distinct human T cell subset involved in epidermal  
314 immunity and remodeling. *J Clin Invest*, 119(12), 3573-85 (2009)  
315 doi:10.1172/JCI40202
- 316 7. T. Chtanova, S. G. Tangye, R. Newton, N. Frank, M. R. Hodge, M. S. Rolph and C.  
317 R. Mackay: T follicular helper cells express a distinctive transcriptional profile,  
318 reflecting their role as non-Th1/Th2 effector cells that provide help for B cells. *J*  
319 *Immunol*, 173(1), 68-78 (2004)
- 320 8. M. Dominguez-Villar, C. M. Baecher-Allan and D. A. Hafler: Identification of T  
321 helper type 1-like, Foxp3+ regulatory T cells in human autoimmune disease. *Nat*  
322 *Med*, 17(6), 673-5 (2011) doi:10.1038/nm.2389
- 323 9. M. J. McCarron and J. C. Marie: TGF-beta prevents T follicular helper cell  
324 accumulation and B cell autoreactivity. *J Clin Invest*, 124(10), 4375-86 (2014)  
325 doi:10.1172/jci76179
- 326 10. T. H. Tran, F. E. Utama, J. Lin, N. Yang, A. B. Sjolund, A. Ryder, K. J. Johnson, L. M.  
327 Neilson, C. Liu, K. L. Brill, A. L. Rosenberg, A. K. Witkiewicz and H. Rui: Prolactin  
328 inhibits BCL6 expression in breast cancer through a Stat5a-dependent mechanism.  
329 *Cancer Res*, 70(4), 1711-21 (2010) doi:10.1158/0008-5472.can-09-2314
- 330 11. R. J. Johnston, Y. S. Choi, J. A. Diamond, J. A. Yang and S. Crotty: STAT5 is a potent  
331 negative regulator of TFH cell differentiation. *J Exp Med*, 209(2), 243-50 (2012)  
332 doi:10.1084/jem.20111174
- 333 12. M. A. Linterman, L. Beaton, D. Yu, R. R. Ramiscal, M. Srivastava, J. J. Hogan, N. K.  
334 Verma, M. J. Smyth, R. J. Rigby and C. G. Vinuesa: IL-21 acts directly on B cells to  
335 regulate Bcl-6 expression and germinal center responses. *J Exp Med*, 207(2), 353-63  
336 (2010) doi:10.1084/jem.20091738
- 337 13. P. Schaerli, P. Loetscher and B. Moser: Cutting edge: induction of follicular  
338 homing precedes effector Th cell development. *J Immunol*, 167(11), 6082-6 (2001)
- 339 14. S. Nakayamada, Y. Kanno, H. Takahashi, D. Jankovic, K. T. Lu, T. A. Johnson, H. W.

- 340 Sun, G. Vahedi, O. Hakim, R. Handon, P. L. Schwartzberg, G. L. Hager and J. J. O'Shea:  
341 Early Th1 cell differentiation is marked by a Tfh cell-like transition. *Immunity*, 35(6),  
342 919-31 (2011) doi:10.1016/j.immuni.2011.11.012
- 343 15. G. Iezzi, A. Boni, E. Degl'Innocenti, M. Grioni, M. T. Bertilaccio and M. Bellone:  
344 Type 2 cytotoxic T lymphocytes modulate the activity of dendritic cells toward type 2  
345 immune responses. *J Immunol*, 177(4), 2131-7 (2006)
- 346 16. D. Gong, W. Shi, S. J. Yi, H. Chen, J. Groffen and N. Heisterkamp: TGFbeta  
347 signaling plays a critical role in promoting alternative macrophage activation. *BMC*  
348 *Immunol*, 13, 31 (2012) doi:10.1186/1471-2172-13-31
- 349 17. P. Romero, A. Zippelius, I. Kurth, M. J. Pittet, C. Touvrey, E. M. Iancu, P. Corthesy,  
350 E. Devedre, D. E. Speiser and N. Rufer: Four functionally distinct populations of  
351 human effector-memory CD8+ T lymphocytes. *J Immunol*, 178(7), 4112-9 (2007)
- 352 18. P. A. Baars, S. Sierro, R. Arens, K. Tesselaar, B. Hooibrink, P. Klenerman and R. A.  
353 van Lier: Properties of murine (CD8+)CD27- T cells. *Eur J Immunol*, 35(11), 3131-41  
354 (2005) doi:10.1002/eji.200425770
- 355 19. U. Jung, J. E. Foley, A. A. Erdmann, M. A. Eckhaus and D. H. Fowler: CD3/CD28-  
356 costimulated T1 and T2 subsets: differential in vivo allosensitization generates  
357 distinct GVT and GVHD effects. *Blood*, 102(9), 3439-46 (2003) doi:10.1182/blood-  
358 2002-12-3936
- 359 20. C. Mesnil, S. Raulier, G. Paulissen, X. Xiao, M. A. Birrell, D. Pirottin, T. Janss, P.  
360 Starkl, E. Ramery, M. Henket, F. N. Schleich, M. Radermecker, K. Thielemans, L. Gillet,  
361 M. Thiry, M. G. Belvisi, R. Louis, C. Desmet, T. Marichal and F. Bureau: Lung-resident  
362 eosinophils represent a distinct regulatory eosinophil subset. *J Clin Invest*, 126(9),  
363 3279-95 (2016) doi:10.1172/jci85664
- 364 21. H. Toru, M. Eguchi, R. Matsumoto, M. Yanagida, J. Yata and T. Nakahata:  
365 Interleukin-4 promotes the development of tryptase and chymase double-positive  
366 human mast cells accompanied by cell maturation. *Blood*, 91(1), 187-95 (1998)
- 367 22. D. Peritt, S. Robertson, G. Gri, L. Showe, M. Aste-Amezaga and G. Trinchieri:  
368 Differentiation of human NK cells into NK1 and NK2 subsets. *J Immunol*, 161(11),  
369 5821-4 (1998)
- 370 23. M. Nagaki, H. Iwai, T. Naiki, H. Ohnishi, Y. Muto and H. Moriwaki: High levels of  
371 serum interleukin-10 and tumor necrosis factor-alpha are associated with fatality in  
372 fulminant hepatitis. *J Infect Dis*, 182(4), 1103-8 (2000) doi:10.1086/315826
- 373 24. S. J. Aujla, Y. R. Chan, M. Zheng, M. Fei, D. J. Askew, D. A. Pociask, T. A. Reinhart,  
374 F. McAllister, J. Edeal, K. Gaus, S. Husain, J. L. Kreindler, P. J. Dubin, J. M. Pilewski, M.  
375 M. Myerburg, C. A. Mason, Y. Iwakura and J. K. Kolls: IL-22 mediates mucosal host  
376 defense against Gram-negative bacterial pneumonia. *Nat Med*, 14(3), 275-81 (2008)  
377 doi:10.1038/nm1710

- 378 25. S. Rutz, R. Noubade, C. Eidenschenk, N. Ota, W. Zeng, Y. Zheng, J. Hackney, J.  
379 Ding, H. Singh and W. Ouyang: Transcription factor c-Maf mediates the TGF-beta-  
380 dependent suppression of IL-22 production in T(H)17 cells. *Nat Immunol*, 12(12),  
381 1238-45 (2011) doi:10.1038/ni.2134
- 382 26. J. P. Coutelier, J. T. van der Logt, F. W. Heessen, A. Vink and J. van Snick: Virally  
383 induced modulation of murine IgG antibody subclasses. *J Exp Med*, 168(6), 2373-8  
384 (1988)
- 385 27. G. R. Siber, P. H. Schur, A. C. Aisenberg, S. A. Weitzman and G. Schiffman:  
386 Correlation between serum IgG-2 concentrations and the antibody response to  
387 bacterial polysaccharide antigens. *N Engl J Med*, 303(4), 178-82 (1980)  
388 doi:10.1056/nejm198007243030402
- 389 28. J. D. Turner, H. Faulkner, J. Kamgno, M. W. Kennedy, J. Behnke, M. Boussinesq  
390 and J. E. Bradley: Allergen-specific IgE and IgG4 are markers of resistance and  
391 susceptibility in a human intestinal nematode infection. *Microbes Infect*, 7(7-8), 990-  
392 6 (2005) doi:10.1016/j.micinf.2005.03.036
- 393 29. Z. Yao, Y. Kanno, M. Kerenyi, G. Stephens, L. Durant, W. T. Watford, A. Laurence,  
394 G. W. Robinson, E. M. Shevach, R. Moriggl, L. Hennighausen, C. Wu and J. J. O'Shea:  
395 Nonredundant roles for Stat5a/b in directly regulating Foxp3. *Blood*, 109(10), 4368-  
396 75 (2007) doi:10.1182/blood-2006-11-055756
- 397 30. H. X. Wei, Y. H. Chuang, B. Li, H. Wei, R. Sun, Y. Moritoki, M. E. Gershwin, Z. X.  
398 Lian and Z. Tian: CD4+ CD25+ Foxp3+ regulatory T cells protect against T cell-  
399 mediated fulminant hepatitis in a TGF-beta-dependent manner in mice. *J Immunol*,  
400 181(10), 7221-9 (2008)
- 401 31. H. Zan, A. Cerutti, P. Dramitinos, A. Schaffer and P. Casali: CD40 engagement  
402 triggers switching to IgA1 and IgA2 in human B cells through induction of  
403 endogenous TGF-beta: evidence for TGF-beta but not IL-10-dependent direct S mu--  
404 >S alpha and sequential S mu-->S gamma, S gamma-->S alpha DNA recombination. *J*  
405 *Immunol*, 161(10), 5217-25 (1998)
- 406 32. B. He, W. Xu, P. A. Santini, A. D. Polydorides, A. Chiu, J. Estrella, M. Shan, A.  
407 Chadburn, V. Villanacci, A. Plebani, D. M. Knowles, M. Rescigno and A. Cerutti:  
408 Intestinal bacteria trigger T cell-independent immunoglobulin A(2) class switching by  
409 inducing epithelial-cell secretion of the cytokine APRIL. *Immunity*, 26(6), 812-26  
410 (2007) doi:10.1016/j.immuni.2007.04.014
- 411 33. R. A. O'Connor, M. D. Leech, J. Suffner, G. J. Hammerling and S. M. Anderton:  
412 Myelin-reactive, TGF-beta-induced regulatory T cells can be programmed to develop  
413 Th1-like effector function but remain less proinflammatory than myelin-reactive Th1  
414 effectors and can suppress pathogenic T cell clonal expansion in vivo. *J Immunol*,  
415 185(12), 7235-43 (2010) doi:10.4049/jimmunol.1001551

- 416 34. V. Dardalhon, A. Awasthi, H. Kwon, G. Galileos, W. Gao, R. A. Sobel, M.  
417 Mitsdoerffer, T. B. Strom, W. Elyaman, I. C. Ho, S. Khoury, M. Oukka and V. K. Kuchroo:  
418 IL-4 inhibits TGF-beta-induced Foxp3+ T cells and, together with TGF-beta, generates  
419 IL-9+ IL-10+ Foxp3(-) effector T cells. *Nat Immunol*, 9(12), 1347-55 (2008)  
420 doi:10.1038/ni.1677
- 421 35. R. Goswami, R. Jabeen, R. Yagi, D. Pham, J. Zhu, S. Goenka and M. H. Kaplan:  
422 STAT6-dependent regulation of Th9 development. *J Immunol*, 188(3), 968-75 (2012)  
423 doi:10.4049/jimmunol.1102840
- 424 36. C. M. Westerberg, E. Ulleras and G. Nilsson: Differentiation of mast cell  
425 subpopulations from mouse embryonic stem cells. *J Immunol Methods*, 382(1-2),  
426 160-6 (2012) doi:10.1016/j.jim.2012.05.020
- 427 37. C. Pilette, K. T. Nouri-Aria, M. R. Jacobson, L. K. Wilcock, B. Detry, S. M. Walker, J.  
428 N. Francis and S. R. Durham: Grass pollen immunotherapy induces an allergen-  
429 specific IgA2 antibody response associated with mucosal TGF-beta expression. *J*  
430 *Immunol*, 178(7), 4658-66 (2007)

431

432

433

434

435

436

437

438

439

440

441

442

443

444

445 Figure legends

446

447 Figure 1. The summary diagram of host immunological pathways. In the middle, Tfh  
448 side (follicular help T cell) begins the initiatory immunity; on the other hand, Treg  
449 side (regulatory T cells) initiates the regulatory immunity. Eradicable TH1 and  
450 tolerable TH1-like(TH1k) are related as shown in the diagonal line. Eradicable TH2  
451 and tolerable TH9 are related as shown in the diagonal line. Eradicable TH22 and  
452 tolerable TH17 are related in the diagonal line. Eradicable TH $\alpha\beta$  and tolerable TH3  
453 are related in the diagonal line.

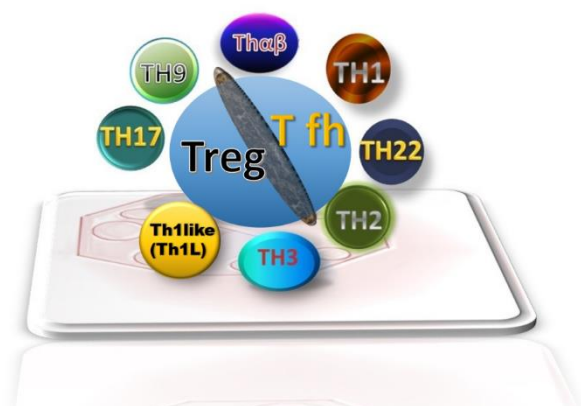

454

455

456

457

458

459

460
